# Supplementary material for: Photothermal Properties of IR-780-Based Nanoparticles Depend on Nanocarrier Design: A Comparative Study on Synthetic Liposomes and Cell Membrane and Hybrid Biomimetic Vesicles
Source: MDPI journal article supplement (doi:10.3390/pharmaceutics15020444), 2023-01-29
Supplement: s1 [file s1]

# Supplementary Material

## Photothermal Properties of IR-780-Based Nanoparticles Depend on Nanocarrier Design: A Comparative Study on Synthetic Liposomes and Cell Membrane and Hybrid Biomimetic Vesicles

Júlia Muniz Barcelos<sup>1</sup>, Tácio Gonçalves Hayasaki<sup>2</sup>, Ricardo Costa de Santana<sup>1</sup>, Eliana Martins Lima<sup>2,3</sup>, Sebastião Antonio Mendanha<sup>1,2,3</sup> and Andris Figueiroa Bakuzis<sup>1,3,\*</sup>

<sup>1</sup> Institute of Physics, Federal University of Goiás, Goiânia 74690-900, GO, Brazil;

<sup>2</sup> Farmatec, School of Pharmacy, Federal University of Goiás, Goiânia 74690-631, GO, Brazil;

<sup>3</sup> CNanomed, Federal University of Goiás, Goiânia 74690-631, GO, Brazil;

\*Correspondence: bakuzis@ufg.br;

### Nanoparticle size distribution curves

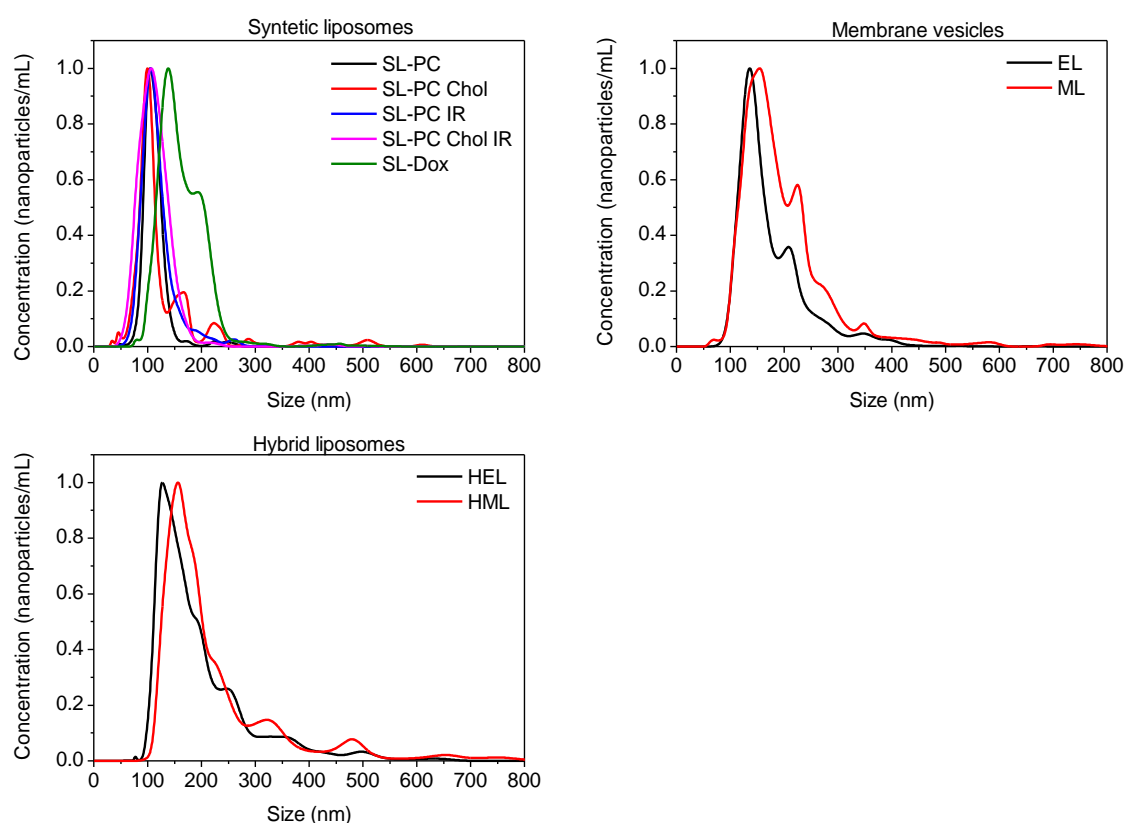

**Figura S1** - Size distribution curves, obtained via nanotracking analysis (NTA) for the different types of synthetic liposomes (SL), membrane vesicles (MV) and hybrid liposomes (HL). From each curve was extracted a nanoparticle diameter expressed as (mean  $\pm$  SD) in Table 1. DOX was loaded in a SL containing 40 mol% of cholesterol and 0.15 mg/mL of IR-780 was incorporated in SL, MV and HL samples.

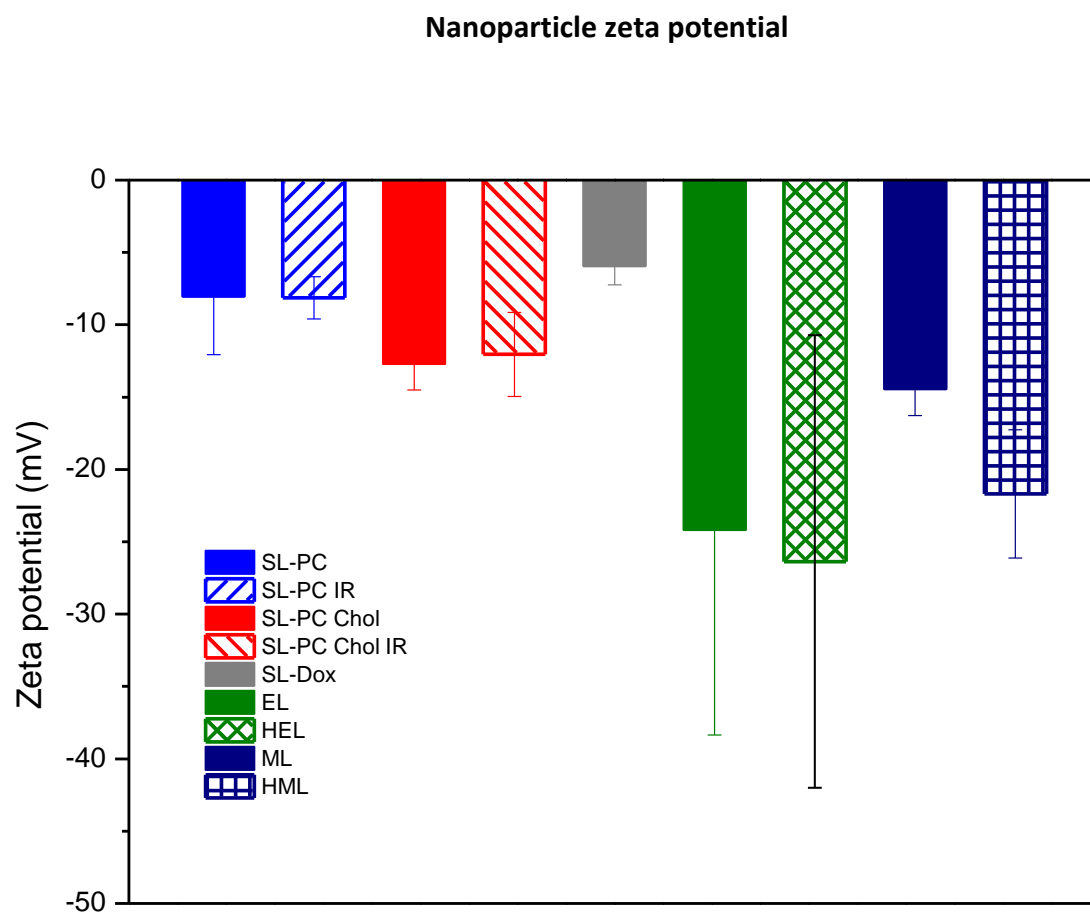

**Figura S2** – Comparison of nanoparticles zeta potential values that are indicated in Table 1. The presence of IR-780 had not altered the liposome superficial charge.

### Maximum temperature during PTT

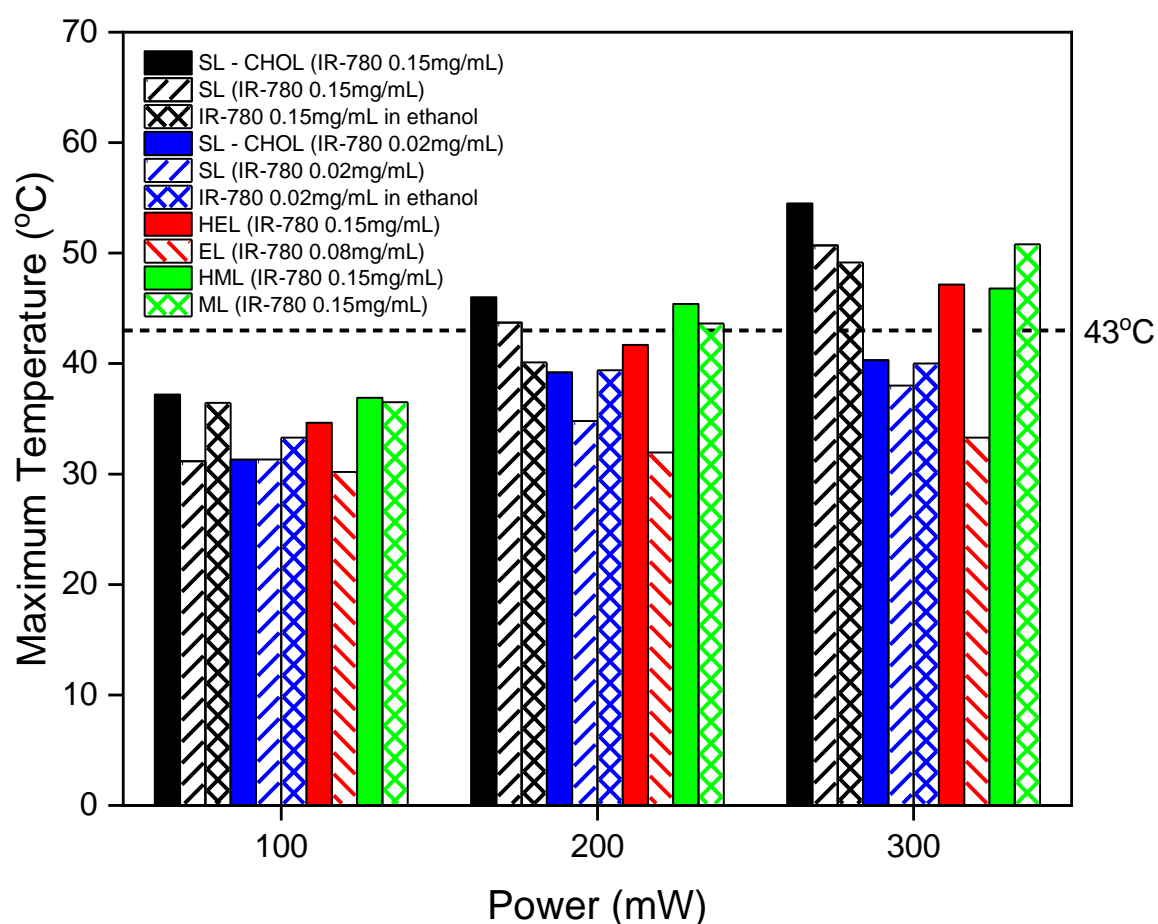

**Figura S3** – Comparison of the maximum temperature achieved by each nanoparticle exposed to a diode laser (808 nm) as a function of it power. The photothermal characteristics of each nanoparticle are summarized in Table S1.

### Photothermal nanoparticle characterization

| Nanoparticle           |             | IR-780 content<br>[mg/mL] | Photothermal efficiency<br>coefficient [%] |        |        | Environment<br>temperature [°C] |     |     | Maximum<br>temperature [°C] |     |     | ΔT [°C]          |     |     |
|------------------------|-------------|---------------------------|--------------------------------------------|--------|--------|---------------------------------|-----|-----|-----------------------------|-----|-----|------------------|-----|-----|
|                        |             |                           | Laser power [mW]                           |        |        | Laser power [mW]                |     |     | Laser power [mW]            |     |     | Laser power [mW] |     |     |
|                        |             |                           | 100                                        | 200    | 300    | 100                             | 200 | 300 | 100                         | 200 | 300 | 100              | 200 | 300 |
| synthetic<br>liposomes | Free        | 0.15                      | 10 ± 1                                     | 7 ± 2  | PBL    | 27                              | 27  | 27  | 36                          | 40  | 49  | 9                | 13  | 22  |
|                        | IR-780      | 0.02                      | 3 ± 1                                      | 7 ± 1  | PBL    | 27                              | 27  | 27  | 33                          | 39  | 40  | 6                | 12  | 13  |
|                        | PC          | 0.15                      | 15 ± 1                                     | 12 ± 1 | 3 ± 2  | 27                              | 27  | 28  | 31                          | 44  | 51  | 4                | 17  | 24  |
|                        |             | 0.02                      | PBL                                        | PBL    | PBL    | 26                              | 28  | 28  | 31                          | 35  | 38  | 5                | 7   | 10  |
|                        | PC-CHOL     | 0.15                      | 27 ± 1                                     | 18 ± 1 | 12 ± 3 | 27                              | 27  | 27  | 37                          | 46  | 55  | 10               | 19  | 28  |
|                        |             | 0.02                      | PBL                                        | PBL    | PBL    | 26                              | 27  | 28  | 37                          | 40  | 49  | 11               | 13  | 21  |
| membrane<br>vesicles   | erythrocyte | 0.08                      | PBL                                        | PBL    | PBL    | 26                              | 27  | 27  | 30                          | 32  | 33  | 4                | 5   | 6   |
|                        | melanoma    | 0.03                      | PBL                                        | PBL    | PBL    | 27                              | 28  | 27  | 37                          | 44  | 51  | 10               | 16  | 24  |
| hybrid<br>liposomes    | erythrocyte | 0.15                      | 21 ± 1                                     | 12 ± 1 | PBL    | 27                              | 28  | 27  | 35                          | 42  | 47  | 8                | 14  | 20  |
|                        | melanoma    | 0.15                      | 29 ± 1                                     | PBL    | PBL    | 27                              | 28  | 26  | 37                          | 45  | 47  | 10               | 17  | 21  |

**Table S1** – Comparison of nanoparticles photothermal proprieties with free IR-780 ethanolic solutions.

## Cell viability assay

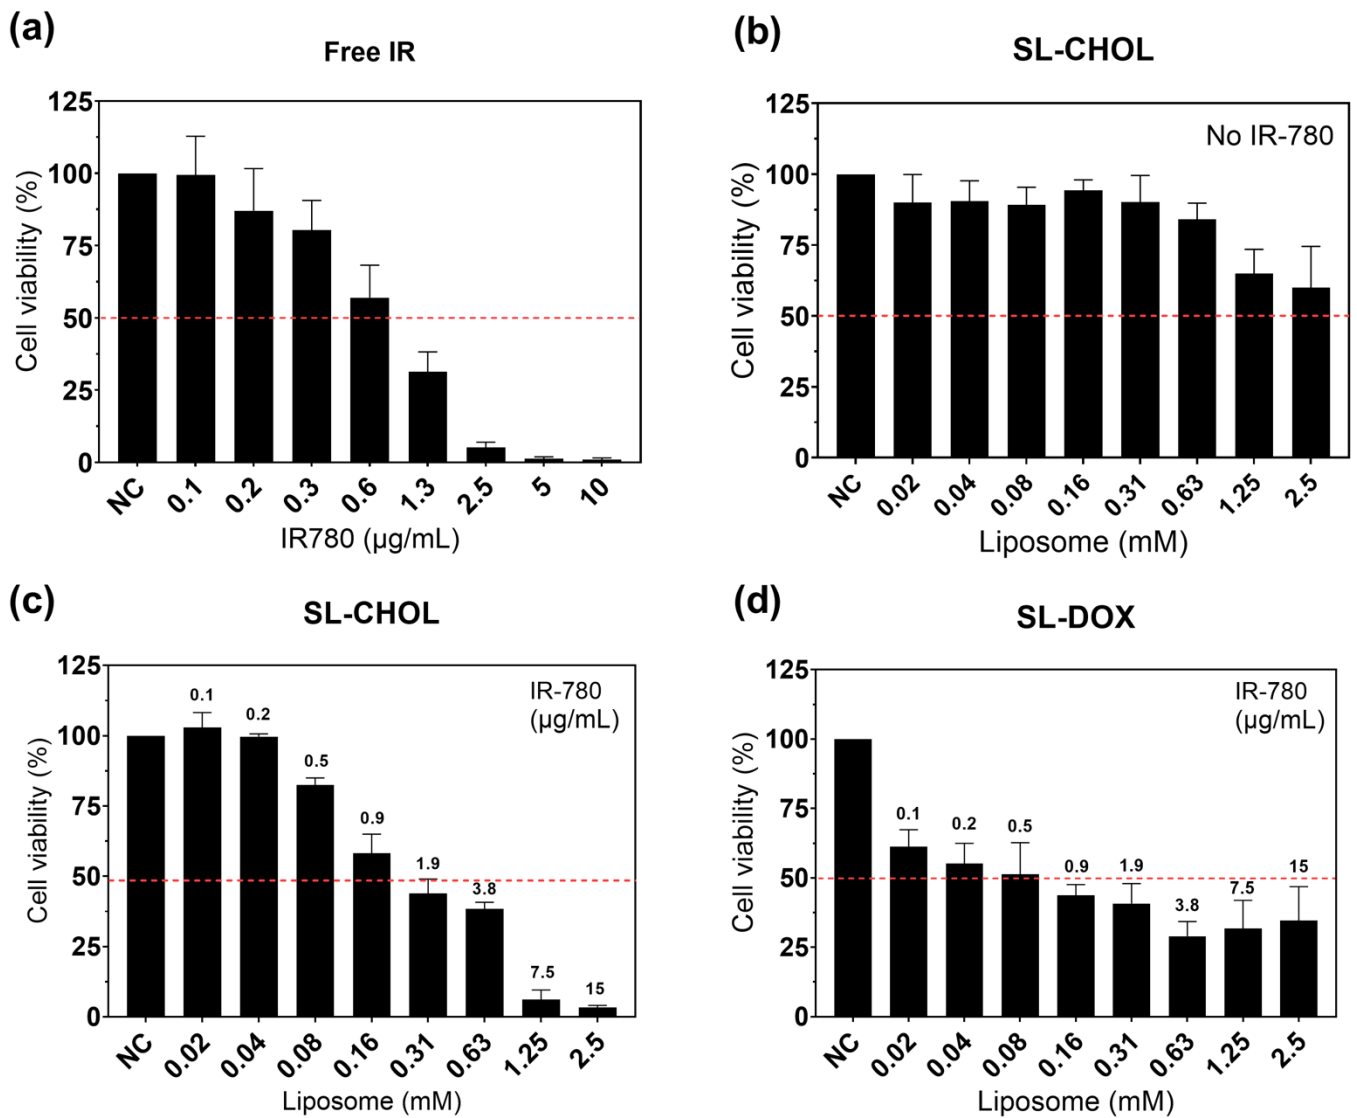

**Figure S4** - Cell viability study without laser irradiation: (a) MTT study as function of free IR-780 concentration; (b) MTT investigation of the toxicity of SL-CHOL without IR-780; (c) MTT study of SL-CHOL containing IR-780; (d) MTT study of SL-DOX. DOX encapsulated in the vesicles decreases the  $\text{IC}_{50}$ . The variation of liposome concentration arises from dilution of the original sample. The IR-780 concentration is indicated for each liposome concentration.

### Thermal dose

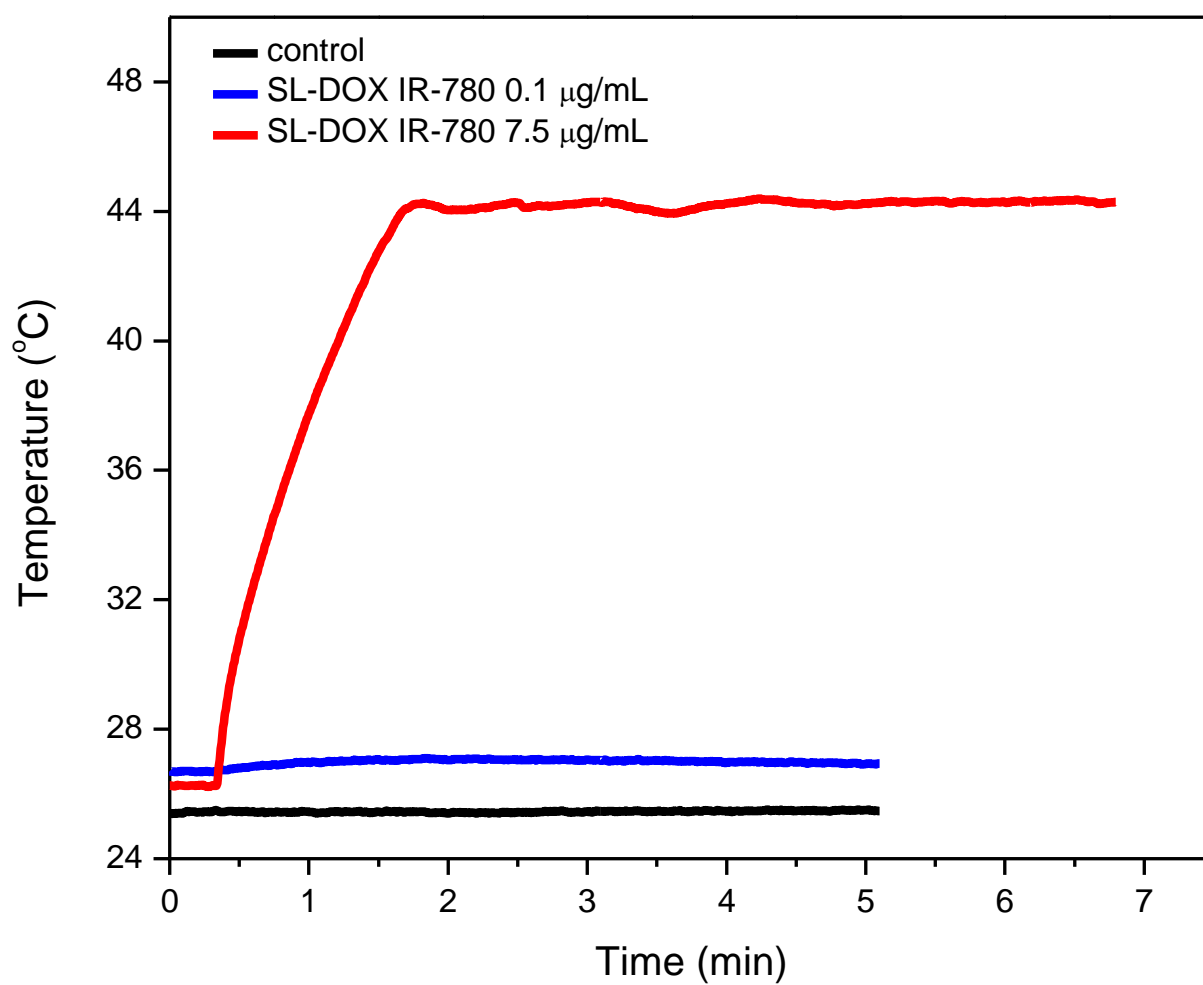

**Figura S5** – Thermal dose applied for control sample (B16-F10 cell in culture medium) and for cells exposed to 0.1 and 7.5 µg/mL of SL-DOX nanoparticles.

## ESR nanoparticle characterization

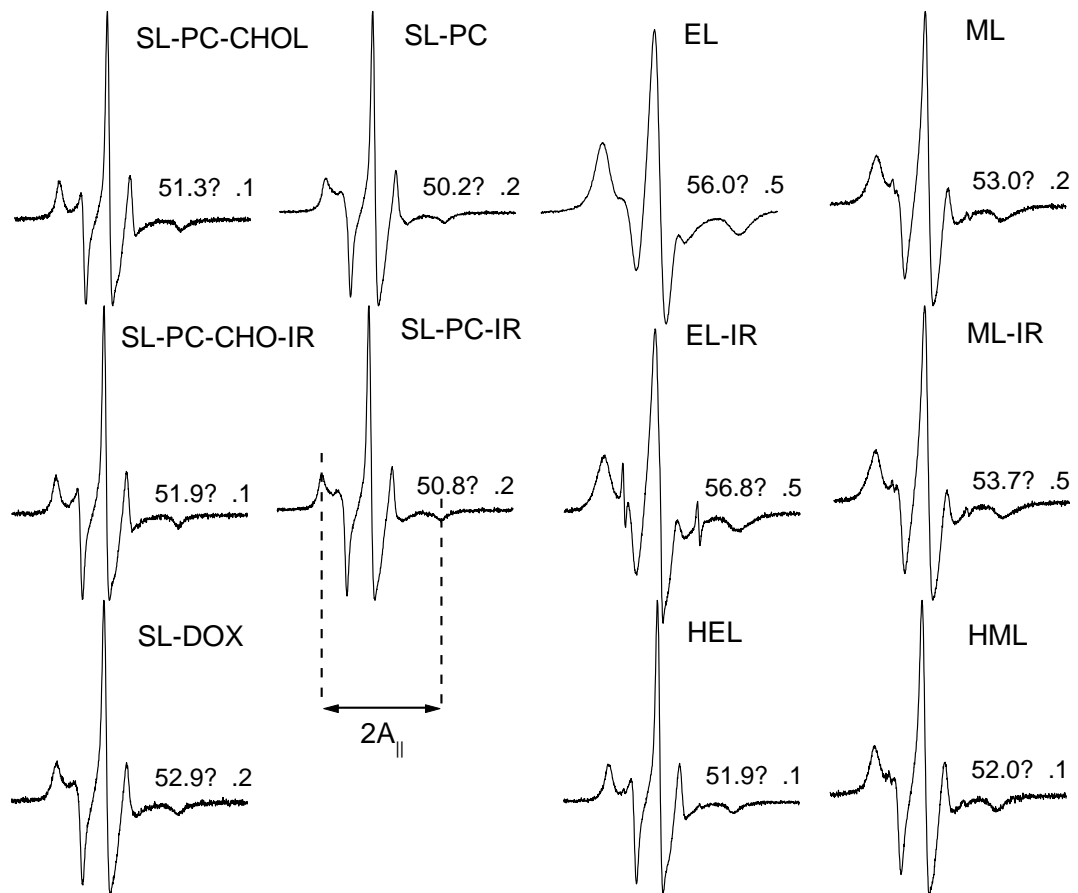

**Figura S6** - ESR spectra of 5-DSA incorporated into the lipid bilayer of the synthetic liposomes (SL), membrane vesicles (MV) and hybrid liposomes (HL), including samples without IR-780 incorporation. The variations in the EPR parameter  $2A_{||}$  (outer hyperfine splitting) are also indicated, and this value is given by the magnetic field separation between the first peak and the last inverted peak of each spectrum. All ESR spectra were recorded using 100 G (X axis) as total scan range of the magnetic field and had their intensity expressed in arbitrary units (Y axis). The decrease in membrane fluidity promoted by cholesterol and/or IR-780 content may be evaluated as an increase in  $2A_{||}$  values.

### Fitting procedure for PCE estimation

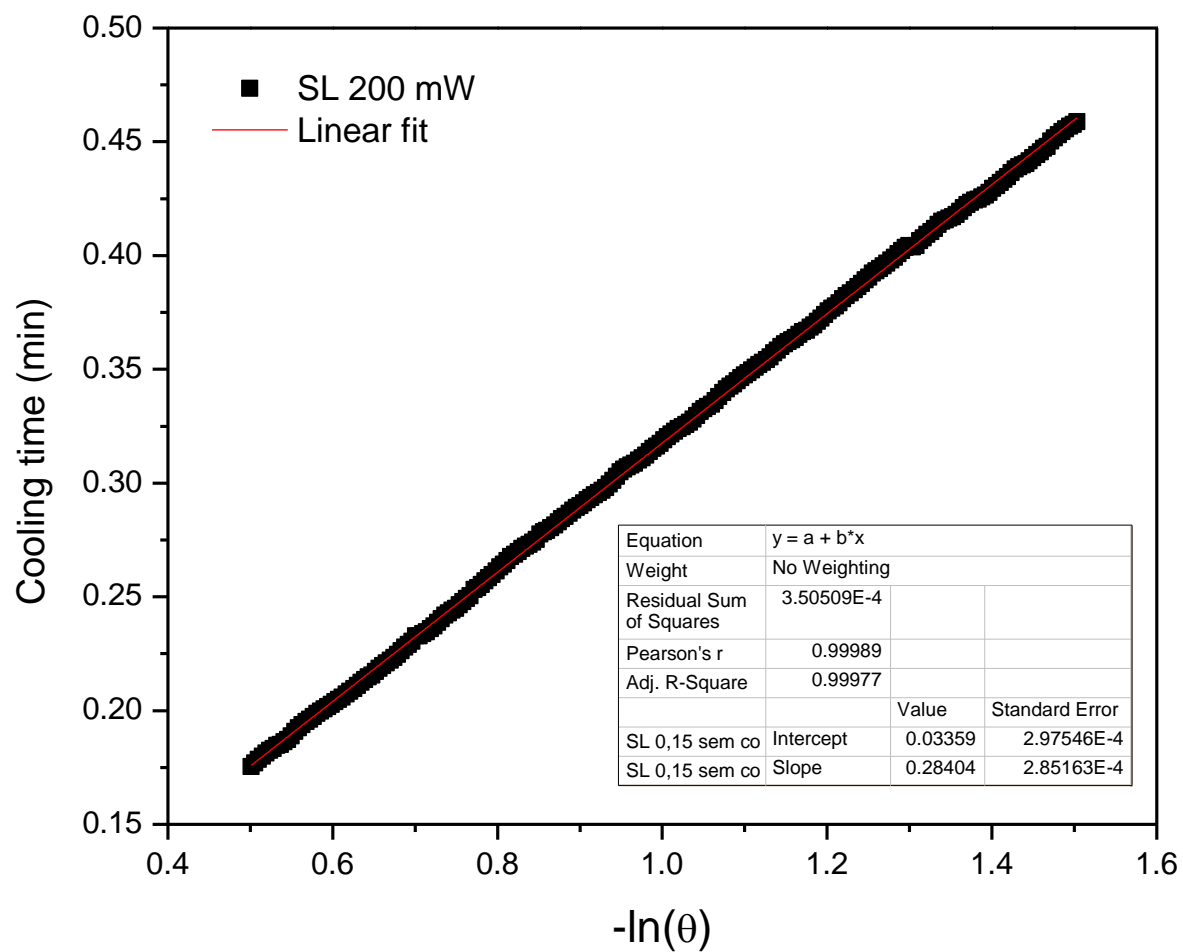

**Figura S7** – Representative example of the fitting procedure performed to obtain PCE values summarized in Table S1.
